# Supplementary material for: Hydration of iron–porphyrins:ab initioquantum mechanical charge field molecular dynamics simulation study
Source: Royal Society of Chemistry journal article supplement (doi:10.1039/c7cp04436d), 2017-01-01
Supplement: c7cp04436d1.pdf [file c7cp04436d1.pdf]

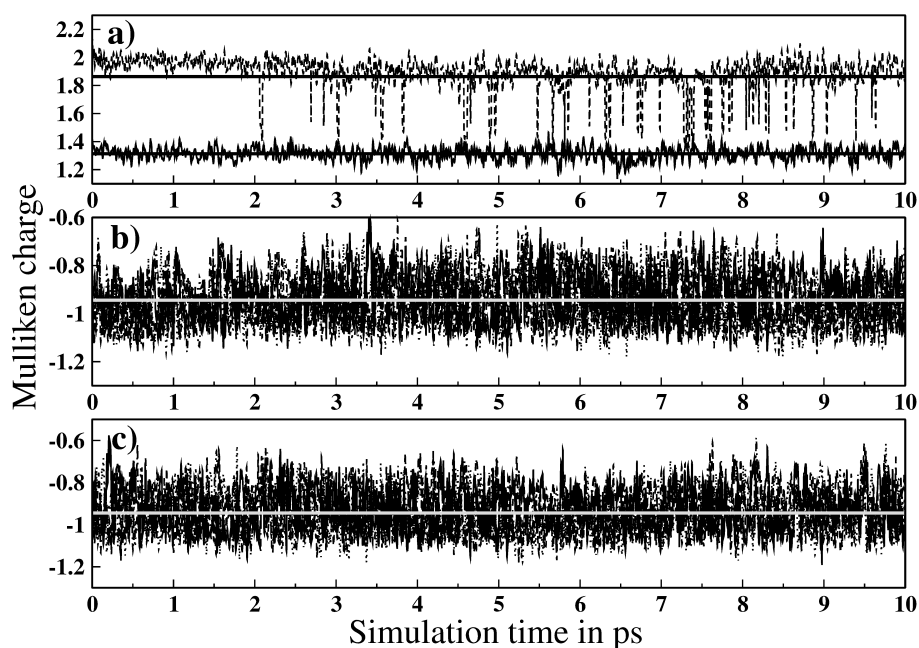

Figure S1: Fluctuation of partial atomic charges of a)  $\text{Fe}^{2+}$  (bold) and  $\text{Fe}^{3+}$  (dashed) and nitrogen partial charges of b) ferrous and c) ferric porphyrin obtained via QMCF-MD simulations+. Horizontal lines represent the respective average values.
